# Supplementary material for: Single-cell RNA sequencing identifies shared differentiation paths of mouse thymic innate T cells
Source: PubMed Central journal article supplement (PMC7459300; doi:10.1038/s41467-020-18155-8), 2020-08-31
Supplement: 41467_2020_18155_MOESM4_ESM.pdf [file 41467_2020_18155_MOESM4_ESM.pdf]

## Description of Additional Supplementary Files

Supplementary Data 1. List of subset specific signature genes

Supplementary Data 2. List of TCR clonotypes
